# Supplementary material
Source: PubMed Central journal article supplement (PMC3568577)
Supplement: AEM.03034-12_zam999104067so1.pdf [file AEM.03034-12_zam999104067so1.pdf]

1 **Detection of putatively thermophilic anaerobic methanotrophs (ANMEs) in diffuse**  
2 **hydrothermal vent fluids**

3

4 **Alexander Y. Merkel<sup>a#</sup>, Julie A. Huber<sup>b</sup>, Nikolay A. Chernyh<sup>a</sup>,**  
5 **Elizaveta A. Bonch-Osmolovskaya<sup>a</sup>, Alexander V. Lebedinsky<sup>a</sup>**

6

7 Winogradsky Institute of Microbiology, Russian Academy of Sciences, Prospekt 60-Letiya  
8 Oktyabrya 7/2, 117312 Moscow, Russia,<sup>a</sup> and Josephine Bay Paul Center, Marine Biological  
9 Laboratory, 7 MBL Street, Woods Hole, MA 02543, USA<sup>b</sup>

10

11 **SUPPLEMENTAL MATERIAL**

12

13

14

15

16

17

18

19

20

21 **Figure S1.** (Left) Locations of the Endeavour Segment and Axial Volcano hydrothermal vent sites  
22 on the Juan de Fuca Ridge in the northeastern Pacific Ocean (map courtesy of NEPTUNE Canada,  
23 NOAA, and NASA). Reprinted from (1). (Right) Map of the Mariana Arc and five volcanoes where  
24 vent fluids were collected (Map courtesy of R. Embley and S. Merle, NOAA/PMEL.). Reprinted  
25 from (2).

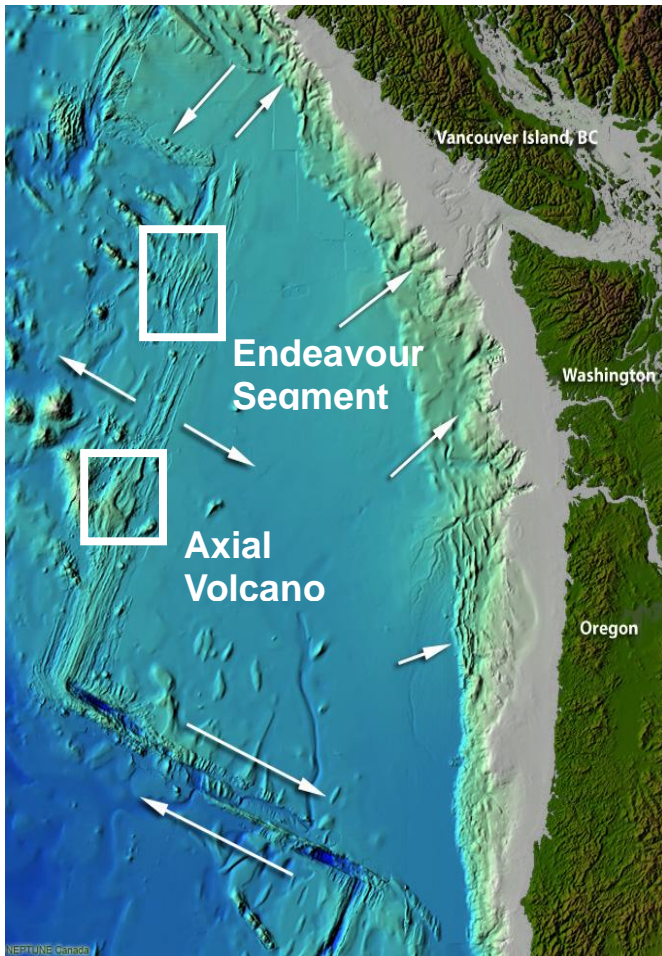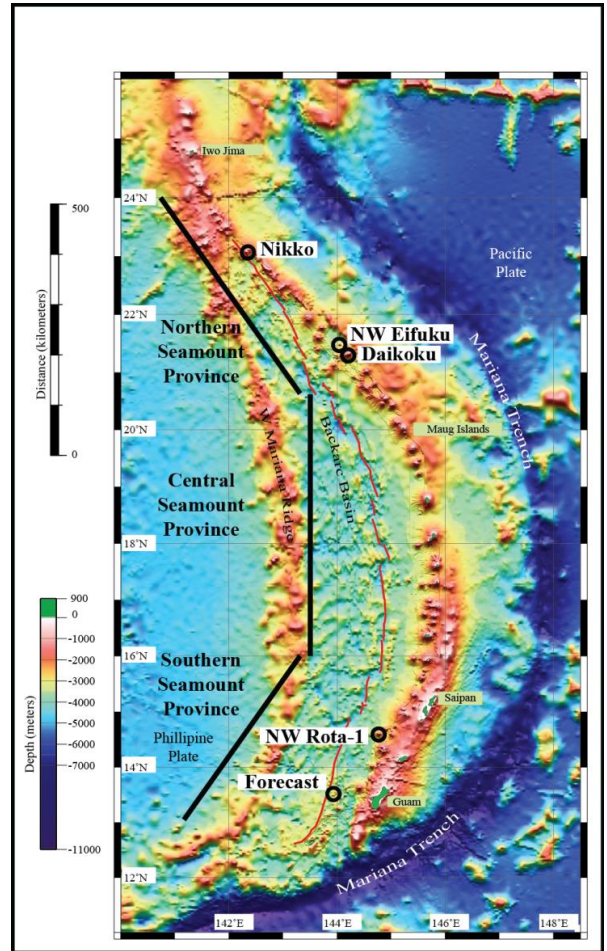

26

27

28 **Figure S2.** Dendrogram showing the phylogenetic position of the deduced amino acid sequences of  
 29 *mcrA* genes retrieved from the FS625 sample (GenBank: HQ635702 and HQ635704) (1) among  
 30 other McrA sequences. The tree was constructed in the ARB software package (3) using maximum-  
 31 likelihood (PHYML) algorithm and non-parametric bootstrap analysis. The percent bootstrap values  
 32 are based on 100 replicates and are indicated at the nodes with  $\geq 50\%$  bootstrap support. Bar=10%  
 33 estimated sequence divergence.

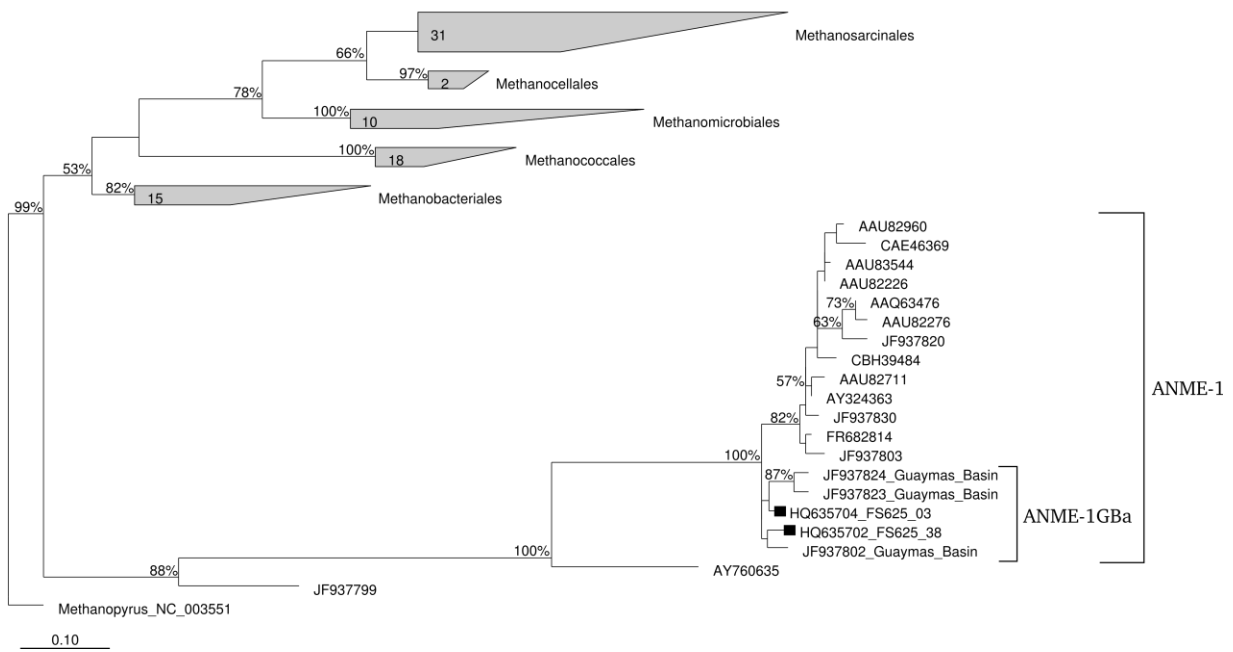

34  
 35  
 36

37 **Table S1.** Description of all diffuse vent fluid samples screened with newly designed primer pair  
 38 targeting ANME-1 16S rRNA genes

| Sample  | Site  | Vent                | Year | T <sub>max</sub> (°C) | T <sub>avg</sub> (°C) | Vol. (ml) | PCR result |
|---------|-------|---------------------|------|-----------------------|-----------------------|-----------|------------|
| A1-Sx10 | Axial | Marker 33 dome      | 2007 | 18.4                  | 14.7                  | 2568      | -          |
| A1-Sx12 | Axial | The Spot near Vixen | 2007 | 30.8                  | 30                    | 3556      | -          |
| A1-Sx13 | Axial | Bag City @ market   | 2007 | 13.7                  | 13.2                  | 3153      | -          |
| A1-Sx15 | Axial | Cloud Pit           | 2007 | 6.5                   | 6.8                   | 3005      | -          |
| A2-Sx10 | Axial | Shepherd            | 2007 | 27.9                  | 25                    | 3049      | -          |
| A2-Sx13 | Axial | T&S @ Chasm         | 2007 | 78.8                  | 75.9                  | 2808      | -          |
| A3-Sx10 | Axial | Zen Garden          | 2007 | 25.7                  | 23.7                  | 3403      | -          |
| A3-Sx11 | Axial | Zen Garden          | 2007 | 7.7                   | 7.2                   | 2903      | -          |
| A3-Sx13 | Axial | Forum cold          | 2007 | 6.1                   | 5.7                   | 2046      | -          |
| A4-Sx11 | Axial | Marker 113          | 2007 | 31.1                  | 30.7                  | 2600      | -          |
| A4-SX12 | Axial | Marker 113          | 2007 | 31.5                  | 31.3                  | 2617      | -          |
| A5-Sx15 | Axial | Gollum @ Ashes      | 2007 | 22.3                  | 21.7                  | 2554      | -          |
| A6-Sx15 | Axial | Notdeadyet @ Cobb   | 2007 | 33.6                  | 24.3                  | 2547      | -          |
| FS600   | Axial | Gollum              | 2008 | 23.3                  | 20.5                  | 4550      | -          |
| FS601   | Axial | Marshmallow         | 2008 | 88                    | 84.9                  | 2026      | -          |
| FS608   | Axial | Marker 33           | 2008 | 20.4                  | 19.7                  | 4048      | -          |
| FS609   | Axial | Cloud               | 2008 | 6.9                   | 6.7                   | 2027      | -          |
| FS610   | Axial | Near Vixen          | 2008 | 24.1                  | 23.5                  | 1268      | -          |
| FS611   | Axial | Bag City            | 2008 | 11.4                  | 11.2                  | 1612      | +          |
| FS612   | Axial | Marker 113          | 2008 | 24.8                  | 23                    | 4001      | -          |

|         |               |                           |      |       |      |      |   |
|---------|---------------|---------------------------|------|-------|------|------|---|
| FS616   | Axial         | Village                   | 2008 | 18.5  | 15.4 | 2002 | - |
| FS617   | Axial         | Hermosa                   | 2008 | 34.4  | 32.9 | 632  | - |
| FS619   | Axial         | 9m                        | 2008 | 35.9  | 29.7 | 2001 | - |
| FS624   | Endeavour     | Salut LT                  | 2008 | 49.9  | 33.7 | 2007 | - |
| FS625   | Endeavour     | Easter Island             | 2008 | 22.1  | 17.8 | 2015 | + |
| FS627   | Endeavour     | S&M LT,<br>east side      | 2008 | 52.4  | 43.4 | 4010 | - |
| FS630   | Endeavour     | Lobo LT                   | 2008 | 28.7  | 22.7 | 2105 | - |
| FS632   | Endeavour     | Hulk LT                   | 2008 | 33.7  | 24.8 | 4030 | - |
| FS634   | Endeavour     | Grotto LT                 | 2008 | 19.8  | 18.1 | 1999 | - |
| FS635   | Endeavour     | Cathedral LT              | 2008 | 24.6  | 22   | 1500 | - |
| FS639   | Endeavour     | Cauldron LT               | 2008 | 45.3  | 38.8 | 1500 | - |
| FS640   | Endeavour     | Cuchalainn<br>LT          | 2008 | 293.4 | 31.5 | 1496 | - |
| FS642   | Endeavour     | background:<br>1750-1500m | 2008 | 2.6   | 2.4  | 1500 | - |
| FS724   | Endeavour     | Fairy Castle              | 2009 | 31.9  | 28.9 | 2527 | - |
| FS725   | Endeavour     | Boardwalk                 | 2009 | 18.2  | 16.4 | 1070 | + |
| FS643   | Endeavour     | Boardwalk<br>LT           | 2008 | 23.2  | 21.1 | 1500 | - |
| FS645   | Endeavour     | Godzilla LT               | 2008 | 35.1  | 29   | 3964 | - |
| FS431   | Forecast      | Snail Scrum               | 2006 | 16.0  | 6.0  | 2050 | - |
| FS432   | Forecast      | Homer Vent                | 2006 | 19.0  | 6.5  | 2015 | - |
| FS445   | NW Rota-<br>1 | Brimstone                 | 2006 | 27.9  | 19.7 | 3004 | - |
| FS446   | NW Rota-<br>1 | Iceberg                   | 2006 | 53.8  | 48.0 | 3007 | - |
| FS447   | NW Rota-<br>1 | Sandy Saddle              | 2006 | 35.6  | 29.0 | 1960 | - |
| FS448   | NW Rota-<br>1 | Fault Shrimp              | 2006 | 25.9  | 25.0 | 3010 | + |
| FS449   | NW Rota-<br>1 | Scarp Top                 | 2006 | 17.6  | 15.1 | 2000 | - |
| A1-Sx10 | Axial         | Marker 33<br>dome         | 2007 | 18.4  | 14.7 | 2568 | - |

|         |       |                        |      |      |      |      |   |
|---------|-------|------------------------|------|------|------|------|---|
| A1-Sx12 | Axial | The Spot<br>near Vixen | 2007 | 30.8 | 30   | 3556 | - |
| A1-Sx13 | Axial | Bag City @<br>market   | 2007 | 13.7 | 13.2 | 3153 | - |
| A1-Sx15 | Axial | Cloud Pit              | 2007 | 6.5  | 6.8  | 3005 | - |
| A2-Sx10 | Axial | Shepherd               | 2007 | 27.9 | 25   | 3049 | - |
| A2-Sx13 | Axial | T&S @<br>Chasm         | 2007 | 78.8 | 75.9 | 2808 | - |

39 Note. The samples were screened for ANME-1 phylotypes using ANME-1-25(F) – ARCH-915(R)  
40 (4) primer pair.

41

42 **Table S2.** Archaeal isolates with unreported temperature optima that have a 16S rRNA gene G+C  
 43 content ( $P_{GC}$ ) above 60 mol% and are not affiliated with known thermophilic genera

| Organism                           | Accession in RDP (in GenBank) | Culmination of taxonomic lineage in GenBank document | Isolation source     | Reference | $P_{GC}$ , mol% |
|------------------------------------|-------------------------------|------------------------------------------------------|----------------------|-----------|-----------------|
| haloarchaeon_str. T1.6             | S000433079 (AJ270240)         | Halobacteriales                                      | solution-mined brine | 5         | 60.1            |
| halophilic archaeon MK206-1        | S002949589 (AB638840)         | Halobacteriales                                      | no data              | 6         | 60.3            |
| haloarchaeon str. T4.2             | S000433070 (AJ270231)         | Halobacteriales                                      | solution-mined brine | 5         | 60.8            |
| Halobacteriales_archaeon YIM 93590 | S002447619 (JF449412)         | Halobacteriales                                      | no data              | 7         | 63.6            |

44 Notes: The table is based on analysis of the 16S rRNA genes of archaeal isolates available from the  
 45 RDP database (Release 10, Update 28, Jan 12, 2012; 2202 sequences with length >1200 nt).

46 **Table S3.** G+C content of 16S rRNA gene sequences ( $P_{GC}$ ) representing ANME microorganisms  
 47 that were detected in or enriched from various hydrothermal-associated environments with  
 48 indication of corresponding *in situ* or incubation temperatures.

| Accession number | Silva taxonomy  | Our Taxonomy (only in case of ANME-1 cluster) <sup>1</sup> | Taxonomy in original article | $P_{GC}$ | <i>In situ</i> or incubation temperature | Ref. |
|------------------|-----------------|------------------------------------------------------------|------------------------------|----------|------------------------------------------|------|
| AF419638         | ANME-2c         | -                                                          | ANME-2c                      | 55.3     | 2°C to 57°C                              | 8    |
| AF419647         | ANME-2c         | -                                                          | ANME-2c                      | 55.4     | nd                                       | 8    |
| AF419650         | ANME-2c         | -                                                          | ANME-2c                      | 54.8     | nd                                       | 8    |
| AF419644         | ANME-2c         | -                                                          | ANME-2c                      | 55.3     | 2°C to 57°C                              | 8    |
| AF419624         | ANME-1a         | ANME-1a                                                    | ANME-1a                      | 56.0     | 2°C to 74°C                              | 8    |
| AF419625         | ANME-1a         | ANME-1a                                                    | ANME-1a                      | 56.4     | 2°C to 74°C                              | 8    |
| AF419626         | ANME-1a         | ANME-1AT                                                   | ANME-1a                      | 57.5     | 2°C to 74°C                              | 8    |
| AF419649         | ANME-1a         | ANME-1AT                                                   | ANME-1a                      | 57.6     | nd                                       | 8    |
| AF419652         | na <sup>2</sup> | ANME-1AT                                                   | ANME-1a                      | 57.1     | nd                                       | 8    |
| AF419654         | ANME-1a         | ANME-1AT                                                   | ANME-1a                      | 57.1     | nd                                       | 8    |
| AF419627         | ANME-1          | ANME-1AT                                                   | ANME-1a                      | 58.3     | 2°C to 74°C                              | 8    |
| AF419630         | ANME-1          | ANME-1GBa                                                  | ANME-1b                      | 63.1     | 2°C to 74°C                              | 8    |
| AF419655         | ANME-1          | ANME-1GBa                                                  | ANME-1b                      | 62.8     | nd                                       | 8    |
| AF419631         | ANME-1          | ANME-1GBa                                                  | ANME-1b                      | 62.7     | 2°C to 74°C                              | 8    |
| AF419632         | ANME-1          | ANME-1GBa                                                  | ANME-1b                      | 62.5     | 2°C to 74°C                              | 8    |
| AF419638         | ANME-2c         | -                                                          | ANME-2c                      | 55.3     | 2°C to 57°C                              | 8    |
| AY299516         | ANME-3          | -                                                          | ANME-3                       | 52.8     | 20°C to 100°C                            | 9    |
| AY299515         | ANME-3          | -                                                          | ANME-3                       | 53.0     | 20°C to 100°C                            | 9    |
| AY760632         | ANME-1b         | ANME-1a                                                    | ANME-1a                      | 54.1     | 7°C to 60°C                              | 9    |
| DQ270605         | Unclassified    | ANME-1a                                                    | ANME-1a                      | 53.2     | 7°C to 60°C                              | 9    |
| AB252423         | ANME-2c         | -                                                          | ANME-2c                      | 55.0     | >10°C                                    | 10   |
| AB252424         | ANME-2ab        | -                                                          | ANME-2c                      | 55.5     | >10°C                                    | 10   |
| AB260054         | ANME-2ab        | -                                                          | ANME-2b                      | 56.8     | 64°C                                     | 11   |
| AB260055         | ANME-2ab        | -                                                          | ANME-2b                      | 56.9     | 64°C                                     | 11   |
| AB301860         | ANME-1a         | ANME-1a                                                    | ANME-1a                      | 55.8     | 52°C                                     | 12   |
| AM268264         | Unclassified    | ANME-1a                                                    | ANME-1                       | 56.9     | 45 °C                                    | 13   |
| AM418591         | Unclassified    | -                                                          | ANME-3                       | 56.1     | 55°C to 90°C                             | 14   |
| AM418592         | Unclassified    | -                                                          | ANME-3                       | 56.5     | 55°C to 90°C                             | 14   |
| AM418593         | Unclassified    | -                                                          | ANME-2                       | 56.3     | 50°C to 70°C                             | 14   |
| AM418594         | Unclassified    | -                                                          | ANME-2                       | 56.7     | 50°C to 70°C                             | 14   |
| EF644781         | ANME-2ab        | -                                                          | ANME-2                       | 56.0     | nd                                       | 15   |
| EF644784         | ANME-2ab        | -                                                          | ANME-2                       | 56.7     | nd                                       | 15   |
| FR682489         | ANME-1a         | ANME-1a                                                    | ANME-1-Guaymas I             | 56.4     | 50°C                                     | 16   |
| FR682490         | ANME-1          | ANME-1AT                                                   | ANME-1-Guaymas II            | 56.6     | 50°C                                     | 16   |
| FR682491         | ANME-1          | ANME-1AT                                                   | ANME-1-Guaymas II            | 56.9     | 50°C                                     | 16   |
| JF937764         | Unclassified    | -                                                          | ANME-2c                      | 54.1     | 30°C to 35°C                             | 17   |



|                       |              |                 |                |      |              |    |
|-----------------------|--------------|-----------------|----------------|------|--------------|----|
| JF937743              | Unclassified | -               | ANME-2ab       | 54.5 | 30°C to 35°C | 17 |
| JF937751              | Unclassified | ANME-1AT        | ANME-1a        | 56.2 | 15°C to 20°C | 17 |
| JF937770              | Unclassified | ANME-1AT        | ANME-1a        | 55.3 | 60°C to 95°C | 17 |
| JF937719              | Unclassified | ANME-1GBa       | ANME-1 Guaymas | 64.0 | 60°C to 95°C | 17 |
| JF937715              | Unclassified | ANME-1GBa       | ANME-1 Guaymas | 63.8 | 60°C to 95°C | 17 |
| JF937746              | Unclassified | ANME-1GBa       | ANME-1 Guaymas | 64.3 | 15°C to 20°C | 17 |
| JF937791              | Unclassified | ANME-1GBa       | ANME-1 Guaymas | 64.6 | 60°C to 95°C | 17 |
| JF937755              | Unclassified | ANME-1GBa       | ANME-1 Guaymas | 63.5 | 15°C to 20°C | 17 |
| JN919590              | Unclassified | nd <sup>3</sup> | ANME-1a        | 57.6 | 52°C         | 18 |
| JN925693              | Unclassified | nd              | ANME-1a        | 57.5 | 52°C         | 18 |
| JN922003              | Unclassified | nd              | ANME-1a        | 58.4 | 52°C         | 18 |
| JN916619 <sup>4</sup> | Unclassified | nd              | ANME-1a        | 61.5 | 52°C         | 18 |
| JN917740              | Unclassified | ANME-1a         | ANME-1a        | 56.5 | 52°C         | 18 |
| JN920217              | Unclassified | ANME-1AT        | ANME-1a        | 56.7 | 52°C         | 18 |
| JN923285              | Unclassified | ANME-1AT        | ANME-1a        | 56.8 | 52°C         | 18 |
| JN923760              | Unclassified | ANME-1AT        | ANME-1a        | 56.6 | 52°C         | 18 |
| JN919387              | Unclassified | ANME-1AT        | ANME-1a        | 57.7 | 52°C         | 18 |
| JN916455              | Unclassified | ANME-1AT        | ANME-1a        | 57.4 | 52°C         | 18 |
| JN928779              | Unclassified | ANME-1a         | ANME-1a        | 56.3 | 52°C         | 18 |
| JN924050              | Unclassified | ANME-1a         | ANME-1a        | 55.1 | 52°C         | 18 |
| JN918036              | Unclassified | ANME-1a         | ANME-1a        | 56.7 | 52°C         | 18 |
| JN915944              | Unclassified | nd              | ANME-1a        | 56.9 | 52°C         | 18 |
| JN934186              | Unclassified | nd              | ANME-1a        | 56.4 | 52°C         | 18 |
| JN918739              | Unclassified | nd              | ANME-1a        | 57.7 | 52°C         | 18 |
| JN928776              | Unclassified | ANME-1a         | ANME-1c        | 57.3 | 52°C         | 18 |
| JN932428              | Unclassified | ANME-1a         | ANME-1c        | 57.0 | 52°C         | 18 |
| JN921789              | Unclassified | ANME-1a         | ANME-1c        | 56.2 | 52°C         | 18 |
| JN928790              | Unclassified | ANME-1a         | ANME-1c        | 57.3 | 52°C         | 18 |
| JN919646              | Unclassified | ANME-1a         | ANME-1c        | 57.7 | 52°C         | 18 |
| JN929819              | Unclassified | ANME-1a         | ANME-1c        | 58.2 | 52°C         | 18 |
| JN928810              | Unclassified | ANME-1a         | ANME-1c        | 57.4 | 52°C         | 18 |
| JN925024              | Unclassified | ANME-1a         | ANME-1c        | 57.8 | 52°C         | 18 |
| JN933005              | Unclassified | ANME-1a         | ANME-1c        | 57.3 | 52°C         | 18 |
| JN915819              | Unclassified | ANME-1a         | ANME-1c        | 56.5 | 52°C         | 18 |
| JN929815              | Unclassified | ANME-1a         | ANME-1c        | 57.8 | 52°C         | 18 |
| JN920932              | Unclassified | ANME-1a         | ANME-1c        | 58.4 | 52°C         | 18 |
| JN920961              | Unclassified | ANME-1a         | ANME-1c        | 58.9 | 52°C         | 18 |
| JN928769              | Unclassified | ANME-1a         | ANME-1c        | 57.4 | 52°C         | 18 |
| JN927216              | Unclassified | ANME-1a         | ANME-1c        | 57.8 | 52°C         | 18 |
| JN926589              | Unclassified | ANME-1a         | ANME-1c        | 56.6 | 52°C         | 18 |

49 <sup>1</sup> Taxonomic position of sequences was determined by constructing a phylogenetic tree in the ARB  
50 software package (3) using maximum-likelihood (PHYML) algorithm.

51 <sup>2</sup> na – not applicable (no such sequence in Silva database)

52 <sup>3</sup> nd - not determined (sequences represent separate phylogenetic lineages)

53 <sup>4</sup>This is the only sequence beyond the ANME-1GBa group that has  $P_{GC}$  above 60%. However, it is  
54 short (413 bp) and may be chimeric (55% Pintail Quality according to Silva database).

55 **References**

- 56 1. **Ver Eecke HC, Butterfield DA, Huber JA, Lilley MD, Olson EJ, Roe KK, Evanse LJ,**  
57 **Merkel AY, Cantin HV, Holden JF.** 2012. Hydrogen-limited growth of hyperthermophilic  
58 methanogens at deep-sea hydrothermal vents. *Proc. Natl. Acad. Sci. USA.* **109(34):**13674-  
59 13679.
- 60 2. **Huber JA, Cantin HV, Huse SM, Welch DB, Sogin ML, Butterfield DA.** 2010. Isolated  
61 communities of Epsilonproteobacteria in hydrothermal vent fluids of the Mariana Arc  
62 seamounts. *FEMS Microbiol. Ecol.* **73(3):**538-49.
- 63 3. **Ludwig W, Strunk O, Westram R, Richter L, Meier H, Yadhukumar, Buchner A, Lai T,**  
64 **Steppi S, Jobb G, Förster W, Brettske I, Gerber S, Ginhart AW, Gross O, Grumann S,**  
65 **Hermann S, Jost R, König A, Liss T, Lüssmann R, May M, Nonhoff B, Reichel B,**  
66 **Strehlow R, Stamatakis A, Stuckmann N, Vilbig A, Lenke M, Ludwig T, Bode A,**  
67 **Schleifer KH.** 2004. ARB: a software environment for sequence data. *Nucleic. Acids. Res.*  
68 **32(4):**1363–1371.
- 69 4. **Stahl DA, Amann R.** 1991. Development and application of nucleic acid probes in bacterial  
70 systematic, p 205-248. *In* Stackebrandt E, Goodfellow M (ed), *Nucleic acid techniques in*  
71 *bacterial systematics*, John Wiley and Sons Ltd, Chichester.
- 72 5. **McGenity TJ, Gemmell RT, Grant WD, Stan-Lotter H.** 2000. Origins of halophilic  
73 microorganisms in ancient salt deposits. *Environ. Microbiol.* **2(3):**243-250.
- 74 6. **Kondo Y, Minegishi H, Kamekura M, Echigo A, Shimoshige H, Shimane Y, Usami R.** An  
75 extreme halophile in the order Halobacteriales. Unpublished.
- 76 7. **Liu BB, Tang SK, Ming H.** Studies on diversity of cultured Halophilic archaeon in Lop Nur  
77 and its surrounding region and their enzymes screening. Unpublished.
- 78 8. **Teske A, Hinrichs KU, Edgcomb V, de Vera Gomez A, Kysela D, Sylva SP, Sogin ML,**

- 79           **Jannasch HW.** 2002. Microbial diversity of hydrothermal sediments in the Guaymas Basin:  
80           evidence for anaerobic methanotrophic communities. *Appl. Environ. Microbiol.* **68(4)**:1994-  
81           2007.
- 82           9. **Brazelton WJ, Schrenk MO, Kelley DS, Baross JA.** 2006. Methane- and sulfur-  
83           metabolizing microbial communities dominate the Lost City hydrothermal field ecosystem.  
84           *Appl. Environ. Microbiol.* **72(9)**:6257-6270.
- 85           10. **Inagaki F, Kuypers MM, Tsunogai U, Ishibashi J, Nakamura K, Treude T, Ohkubo S,**  
86           **Nakaseama M, Gena K, Chiba H, Hirayama H, Nunoura T, Takai K, Jørgensen BB,**  
87           **Horikoshi K, Boetius A.** 2006. Microbial community in a sediment-hosted CO<sub>2</sub> lake of the  
88           southern Okinawa Trough hydrothermal system. *Proc. Natl. Acad. Sci. USA.* **103(38)**:14164-  
89           14169.
- 90           11. **Nakagawa S, Inagaki F, Suzuki Y, Steinsbu BO, Lever MA, Takai K, Engelen B, Sako Y,**  
91           **Wheat CG, Horikoshi K.** 2006. Microbial community in black rust exposed to hot ridge  
92           flank crustal fluids. *Appl. Environ. Microbiol.* **72(10)**:6789-6799.
- 93           12. **Hirayama H, Sunamura M, Takai K, Nunoura T, Noguchi T, Oida H, Furushima Y,**  
94           **Yamamoto H, Oomori T, Horikoshi K.** 2007. Culture-dependent and -independent  
95           characterization of microbial communities associated with a shallow submarine  
96           hydrothermal system occurring within a coral reef off Taketomi Island, Japan. *Appl. Environ.*  
97           *Microbiol.* **73(23)**:7642-7656.
- 98           13. **Yakimov MM, Giuliano L, Cappello S, Denaro R, Golyshin PN.** 2007. Microbial  
99           community of a hydrothermal mud vent underneath the deep-sea anoxic brine lake Urania  
100           (eastern Mediterranean). *Orig. Life. Evol. Biosph.* **37(2)**:177-188.
- 101           14. **Roussel EG, Bonavita MA, Querellou J, Cragg BA, Webster G, Prieur D, Parkes RJ.**  
102           2008. Extending the sub-sea-floor biosphere. *Science.* **320(5879)**:1046.
- 103           15. **Voordeckers JW, Do MH, Hügler M, Ko V, Sievert SM, Vetriani C.** 2008. Culture

- 104 dependent and independent analyses of 16S rRNA and ATP citrate lyase genes: a comparison  
105 of microbial communities from different black smoker chimneys on the Mid-Atlantic Ridge.  
106 *Extremophiles*. **12(5)**:627-640.
- 107 16. **Holler T, Widdel F, Knittel K, Amann R, Kellermann MY, Hinrichs KU, Teske A,**  
108 **Boetius A, Wegener G.** 2011. Thermophilic anaerobic oxidation of methane by marine  
109 microbial consortia. *ISME J*. **5(12)**:1946-1956.
- 110 17. **Biddle JF, Cardman Z, Mendlovitz H, Albert DB, Lloyd KG, Boetius A, Teske A.** 2012.  
111 Anaerobic oxidation of methane at different temperature regimes in Guaymas Basin  
112 hydrothermal sediments. *ISME J*. **6(5)**:1018-1031.
- 113 18. **Wankel SD, Adams MM, Johnston DT, Hansel CM, Joye SB, Girguis PR.** 2012.  
114 Anaerobic methane oxidation in metalliferous hydrothermal sediments: influence on carbon  
115 flux and decoupling from sulfate reduction. *Environ. Microbiol.* doi: 10.1111/j.1462-  
116 2920.2012.02825.x.
